# Supplementary material
Source: PubMed Central journal article supplement (PMC4231648)

**Supplemental Figure S1 for Teaching Purposes. *Conservation of Piezo proteins.*** Multiple sequence alignment reveals conservation between Piezo proteins. Shades of blue indicate degree of conservation. A hydrophobicity plot of human Piezo1 is show below the amino acid sequence. Many blocks of conservation align with regions of hydrophobicity. Blocks of differences between Piezo1 and Piezo2 proteins, which cluster and align together, are seen.

1 MRSLVQV... 2 MRSLVQV... 3 MRSLVQV... 4 MRSLVQV... 5 MRSLVQV... 6 MRSLVQV... 7 MRSLVQV... 8 MRSLVQV... 9 MRSLVQV... 10 MRSLVQV...

Hydrophobicity

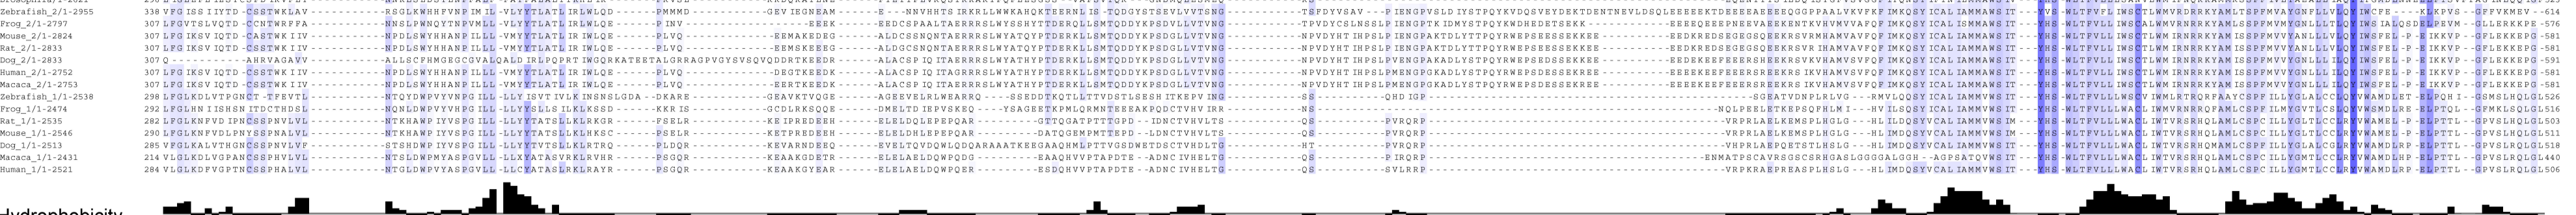

240 LPR... 241 LPR... 242 LPR... 243 LPR... 244 LPR... 245 LPR... 246 LPR... 247 LPR... 248 LPR... 249 LPR... 250 LPR...

Hydrophobicity

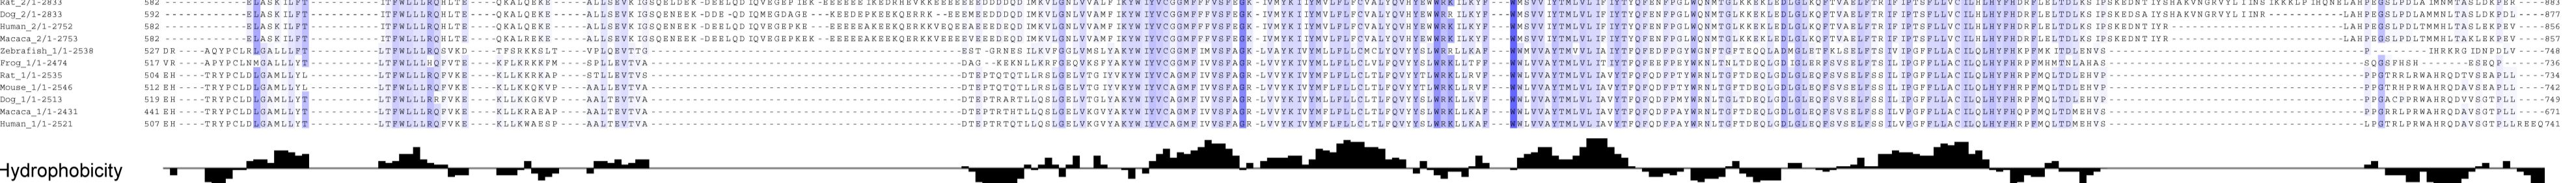

Hydrophobicity

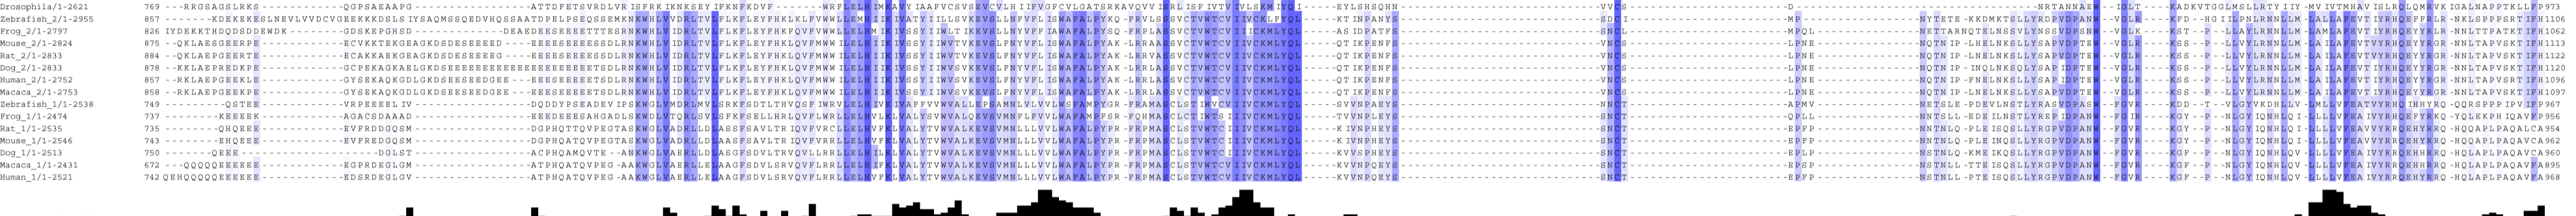

Hydrophobicity

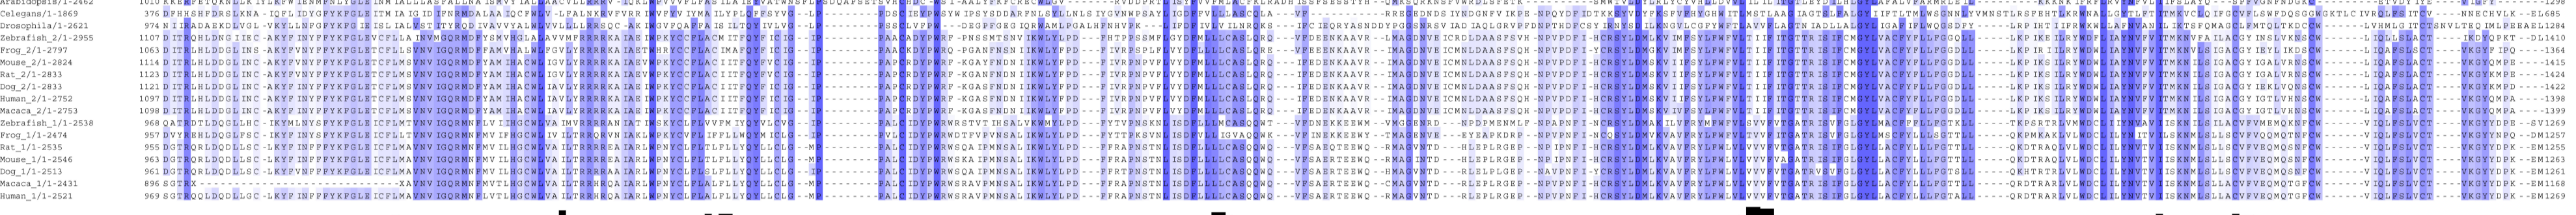

Hydrophobicity

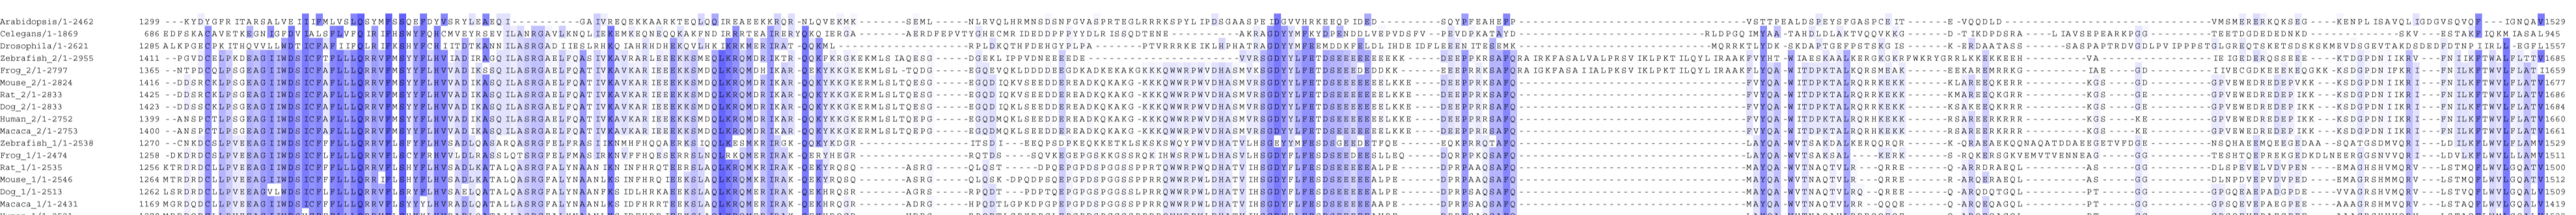

Hydrophobicity

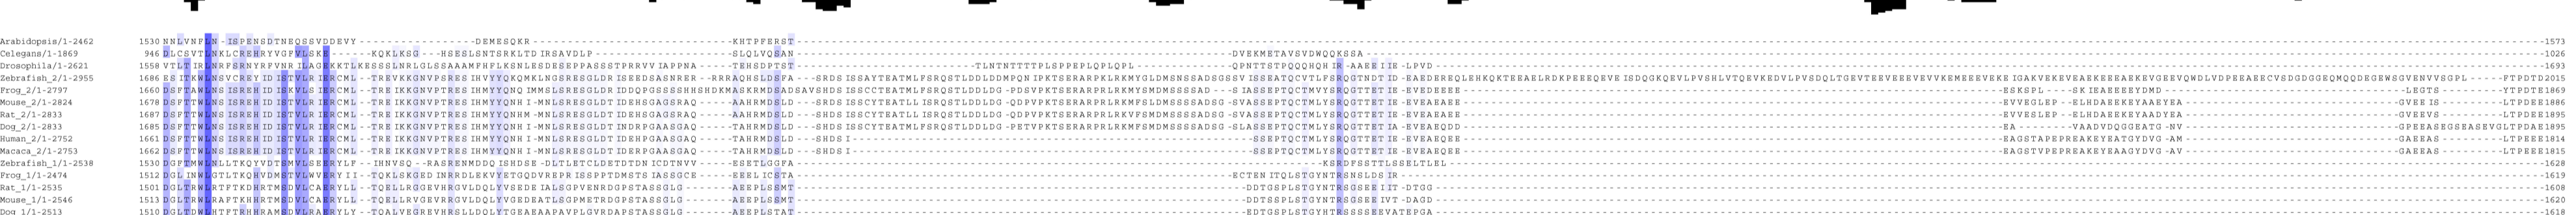

Hydrophobicity

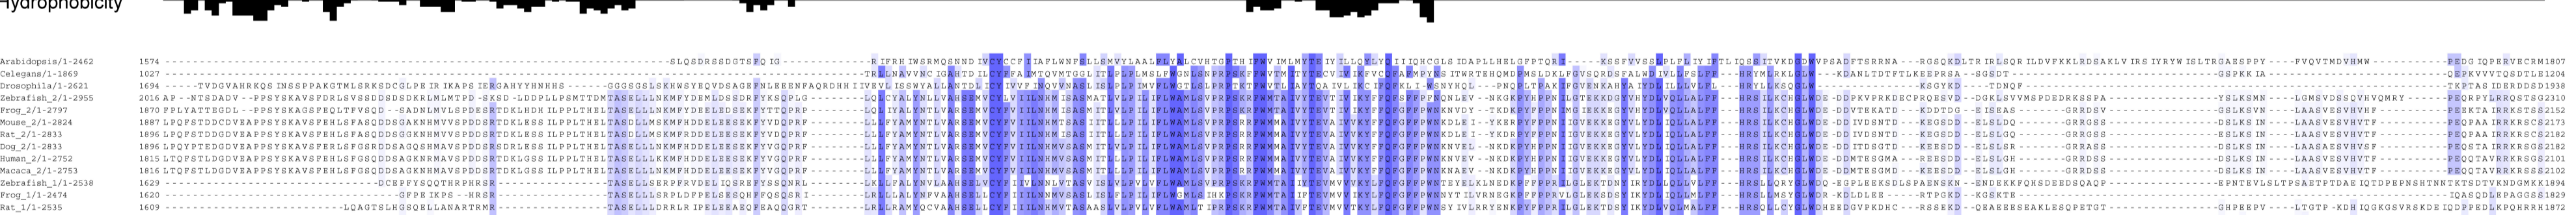

Hydrophobicity

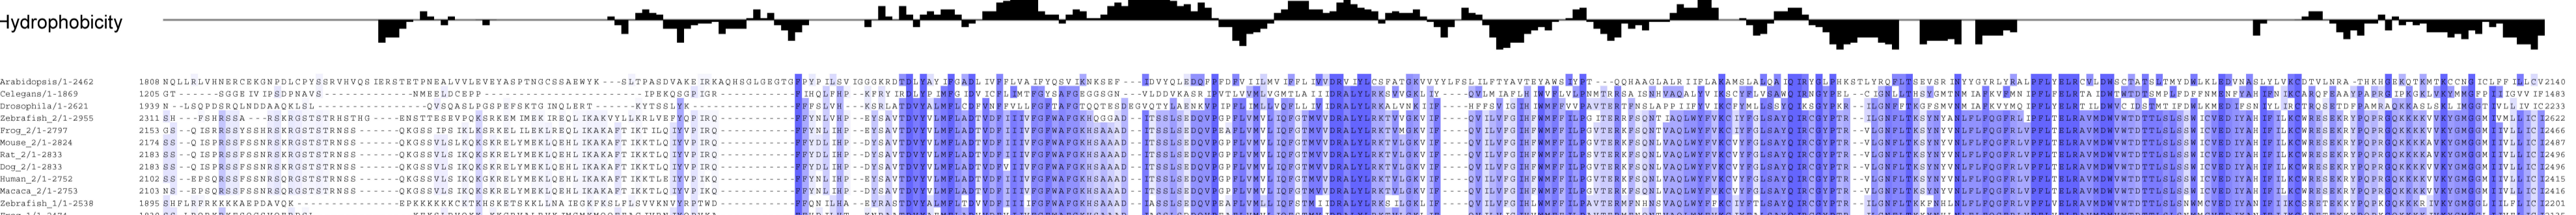

Hydrophobicity

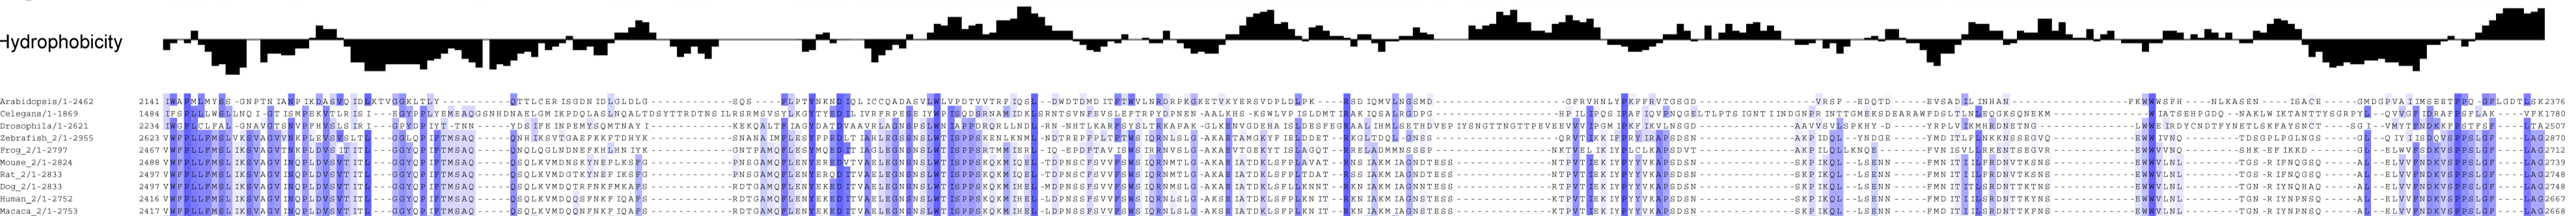

Hydrophobicity

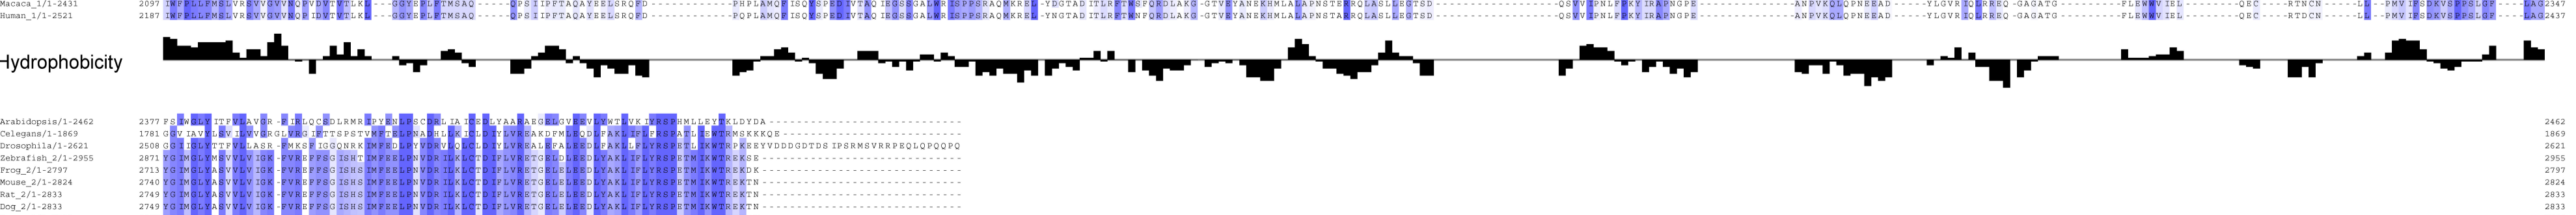

Hydrophobicity

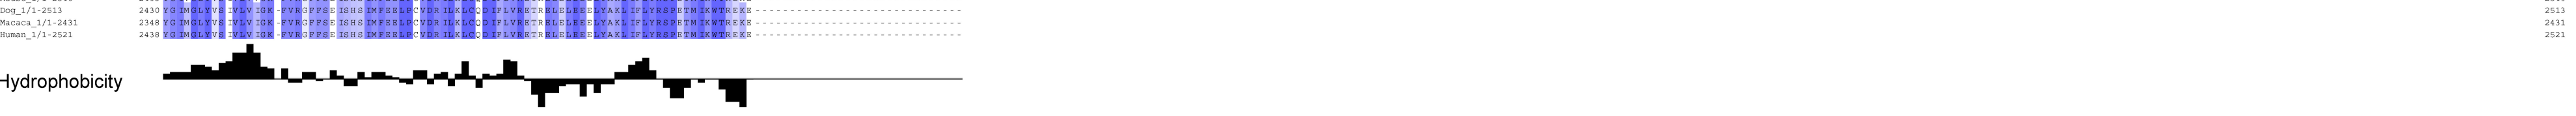

Supplement: supp_R114.612697_jbc.R114.612697-1.pdf [file supp_R114.612697_jbc.R114.612697-1.pdf]
